# Supplementary material
Source: PubMed Central journal article supplement (PMC6233827)

## Supplementary Online Content

Myhre PL, Vaduganathan M, Claggett BL, et al. Association of natriuretic peptides with cardiovascular prognosis in heart failure with preserved ejection fraction: secondary analysis of the TOPCAT randomized clinical trial. *JAMA Cardiol*. Published online August 22, 2018. doi:10.1001/jamacardio.2018.2568

**eTable.** Baseline characteristics of patients in TOPCAT Americas (n=1,767) in patients with and without available natriuretic peptide levels.

**eFigure 1.** Distribution of log-transformed, standardized natriuretic peptide (NP) levels by enrollment strata in TOPCAT Americas.

**eFigure 2.** Baseline natriuretic peptides in 6 subgroups of the hospitalization strata of TOPCAT Americas (n=370).

**eFigure 3.** Baseline natriuretic peptides in 5 subgroups of TOPCAT Russia and Georgia (n=366).

This supplementary material has been provided by the authors to give readers additional information about their work.

**eTable. Baseline characteristics of patients in TOPCAT Americas (n=1,767) in patients with and without available natriuretic peptide levels.**

|                                                   | Available NP Levels<br>(n=1,057, 60%) |         | Missing NP Levels<br>(n=710, 40%) |         | P      |
|---------------------------------------------------|---------------------------------------|---------|-----------------------------------|---------|--------|
| <b>Randomization to Spironolactone</b>            | 535                                   | (50.6%) | 351                               | (49.4%) | 0.63   |
| <b>Eligibility Criteria</b>                       |                                       |         |                                   |         | <0.001 |
| <b>Prior HF Hospitalization in 12mo</b>           | 370                                   | (35.0%) | 606                               | (85.4%) |        |
| <b>Elevated NP in 60 days</b>                     | 687                                   | (65.0%) | 104                               | (14.6%) |        |
| <b>Age (years)</b>                                | 72.3 ± 9.8                            |         | 70.5 ± 9.6                        |         | <0.001 |
| <b>Male</b>                                       | 514                                   | (48.6%) | 368                               | (51.8%) | 0.19   |
| <b>Black</b>                                      | 183                                   | (17.3%) | 119                               | (16.8%) | 0.76   |
| <b>Left Ventricular Ejection Fraction (%)</b>     | 58.2 ± 7.4                            |         | 58.1 ± 8.2                        |         | 0.90   |
| <b>New York Heart Association Class III or IV</b> | 386                                   | (36.7%) | 234                               | (33.0%) | 0.12   |
| <b>Hypertension</b>                               | 952                                   | (90.2%) | 636                               | (89.7%) | 0.76   |
| <b>Diabetes Mellitus</b>                          | 464                                   | (43.9%) | 324                               | (45.7%) | 0.47   |
| <b>eGFR&lt;60 mL/min/1.73 m<sup>2</sup></b>       | 554                                   | (52.4%) | 358                               | (50.4%) | 0.41   |
| <b>Previous Myocardial Infarction</b>             | 217                                   | (20.5%) | 142                               | (20.0%) | 0.79   |
| <b>Previous Cerebrovascular Accident</b>          | 101                                   | (9.6 %) | 57                                | (8.0 %) | 0.27   |
| <b>Peripheral Artery Disease</b>                  | 128                                   | (12.1%) | 79                                | (11.1%) | 0.53   |
| <b>History of Atrial Fibrillation</b>             | 472                                   | (44.7%) | 271                               | (38.2%) | 0.007  |
| <b>Atrial Fibrillation on ECG at inclusion</b>    | 289                                   | (35.0%) | 157                               | (31.2%) | 0.15   |
| <b>Chronic Obstructive Pulmonary Disease</b>      | 178                                   | (16.9%) | 113                               | (15.9%) | 0.61   |
| <b>Body Mass Index (kg/m<sup>2</sup>)</b>         | 33.4 ± 8.5                            |         | 34.7 ± 8.2                        |         | 0.002  |
| <b>Systolic Blood Pressure (mmHg)</b>             | 127.1 ± 15.8                          |         | 128.1 ± 16.0                      |         | 0.19   |
| <b>Heart Rate (bpm)</b>                           | 68.5 ± 11.0                           |         | 69.9 ± 11.6                       |         | 0.008  |
| <b>Baseline Medication Use</b>                    |                                       |         |                                   |         |        |
| <b>β-blocker</b>                                  | 852                                   | (80.6%) | 535                               | (75.6%) | 0.01   |
| <b>Calcium Channel Blocker</b>                    | 414                                   | (39.2%) | 268                               | (37.9%) | 0.58   |
| <b>Diuretic</b>                                   | 937                                   | (88.6%) | 636                               | (89.8%) | 0.43   |
| <b>ACEi/ARB</b>                                   | 816                                   | (77.2%) | 579                               | (81.8%) | 0.02   |
| <b>Statin</b>                                     | 618                                   | (58.5%) | 409                               | (57.8%) | 0.77   |
| <b>Aspirin</b>                                    | 852                                   | (80.6%) | 535                               | (75.6%) | 0.01   |

Data reported as n (%) or mean ± standard deviation

Abbreviations: ACEi/ARB = angiotensin-converting enzyme inhibitor / angiotensin II receptor blocker; ECG = electrocardiogram; eGFR = estimated glomerular filtration rate; HF=heart failure; NP = natriuretic peptide.

**eFigure 1. Distribution of log-transformed, standardized natriuretic peptide (NP) levels by enrollment strata in TOPCAT Americas.**

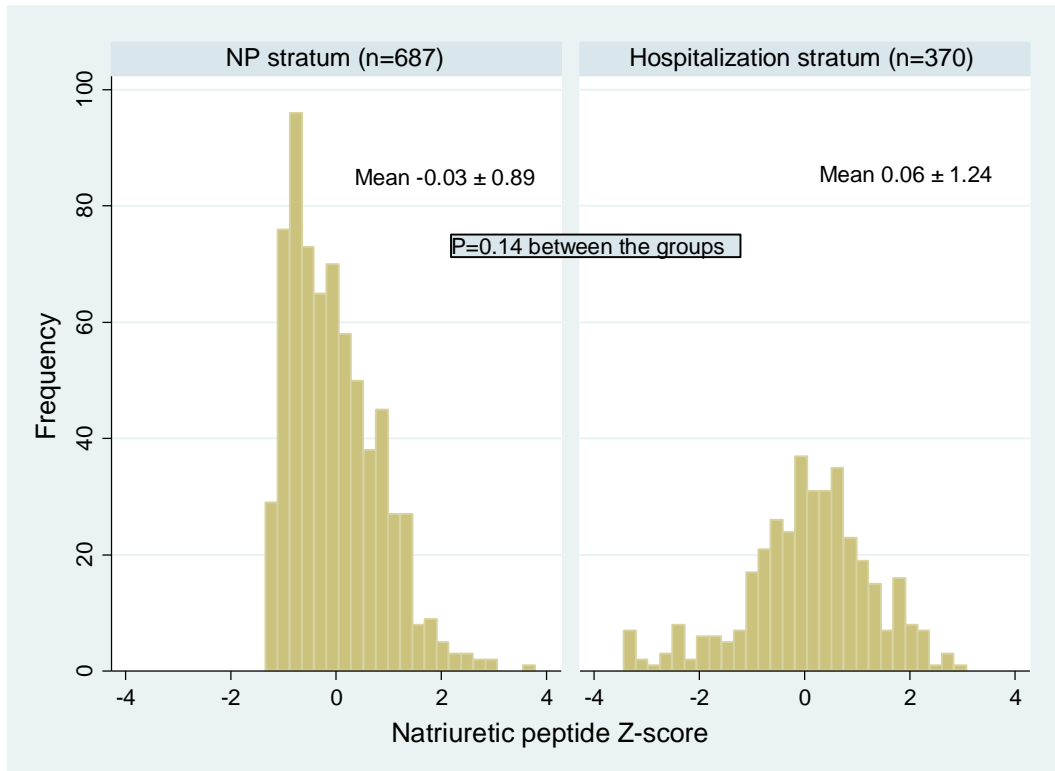

**eFigure 2. Baseline natriuretic peptides in 6 subgroups of the hospitalization strata of TOPCAT Americas (n=370).**

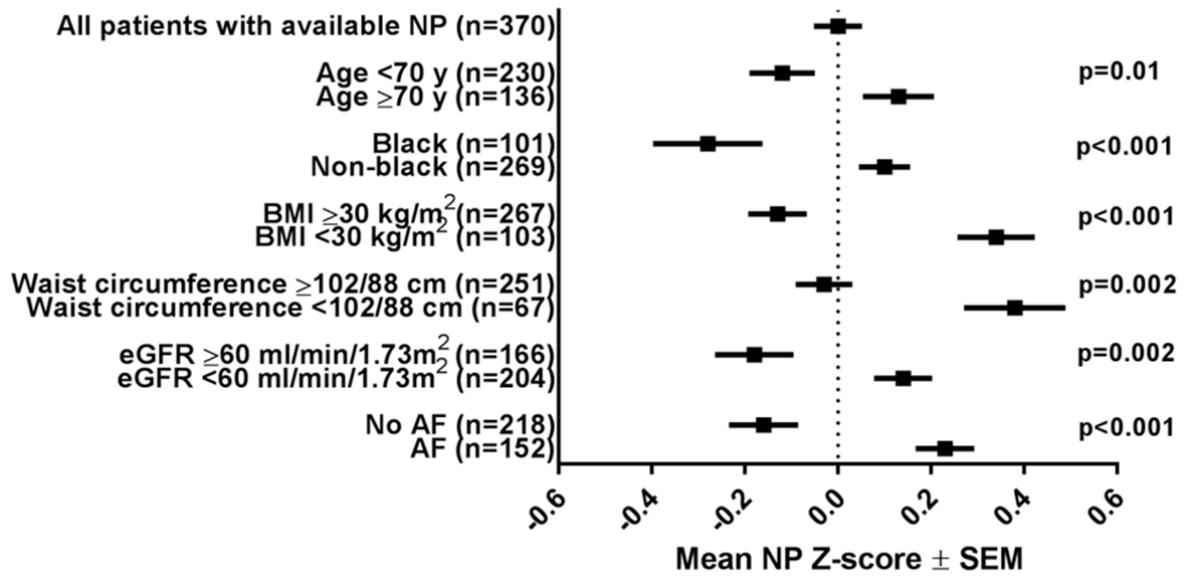

**eFigure 3. Baseline natriuretic peptides in 5 subgroups of TOPCAT Russia and Georgia (n=366).**

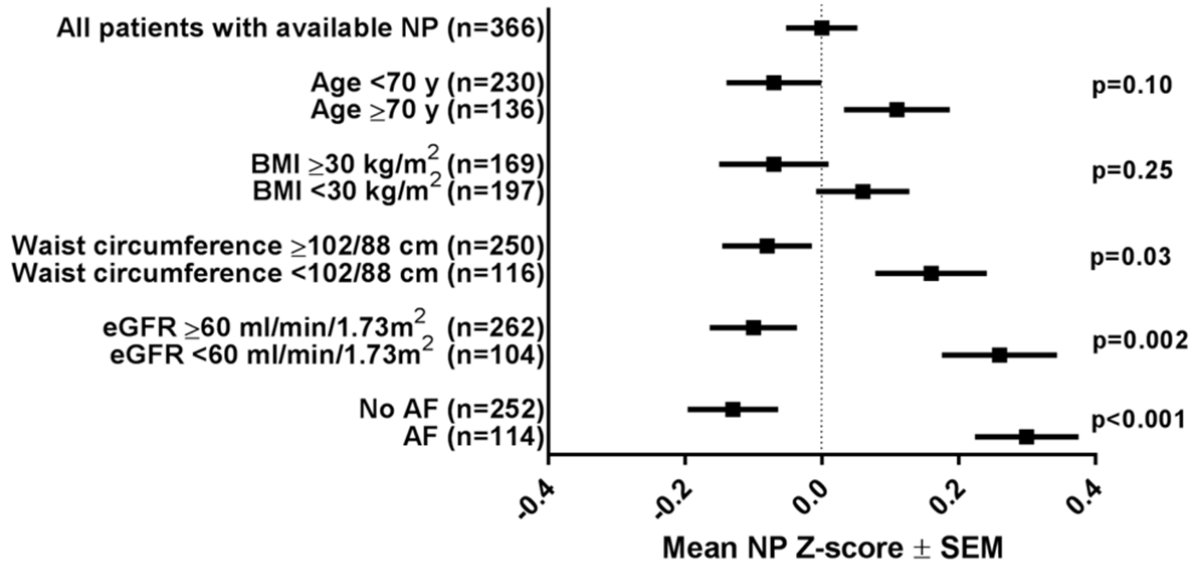

Supplement: jamacardiol-3-1000-s001.pdf [file jamacardiol-3-1000-s001.pdf]
